# Supplementary material
Source: PubMed Central journal article supplement (PMC5225304)

Supplemental Figure S1

Birtolo et al.

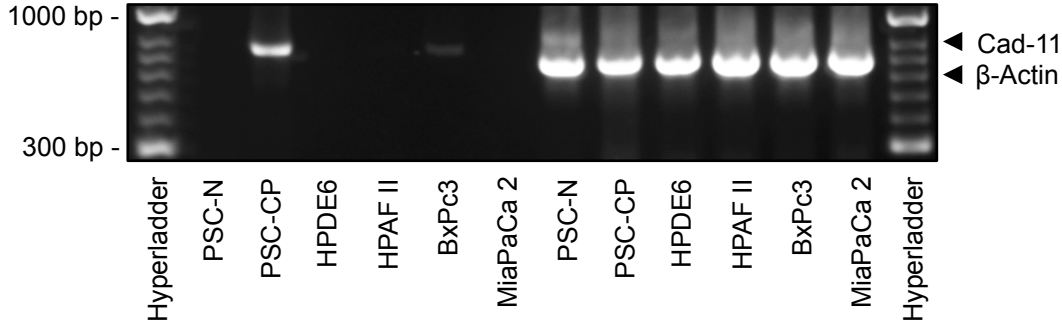

Supplement: mmc1.pdf [file mmc1.pdf]

A

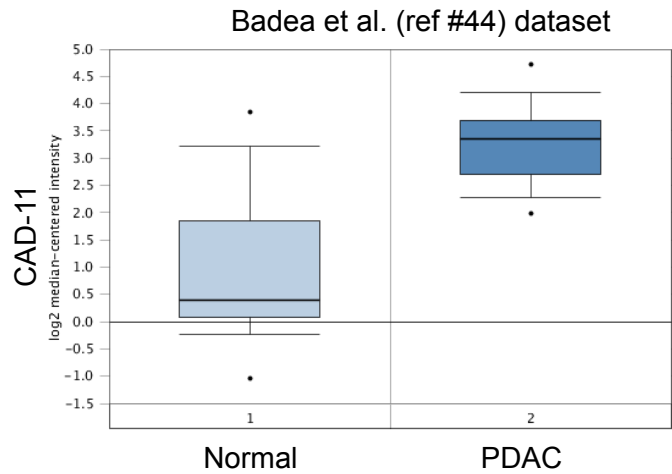

B

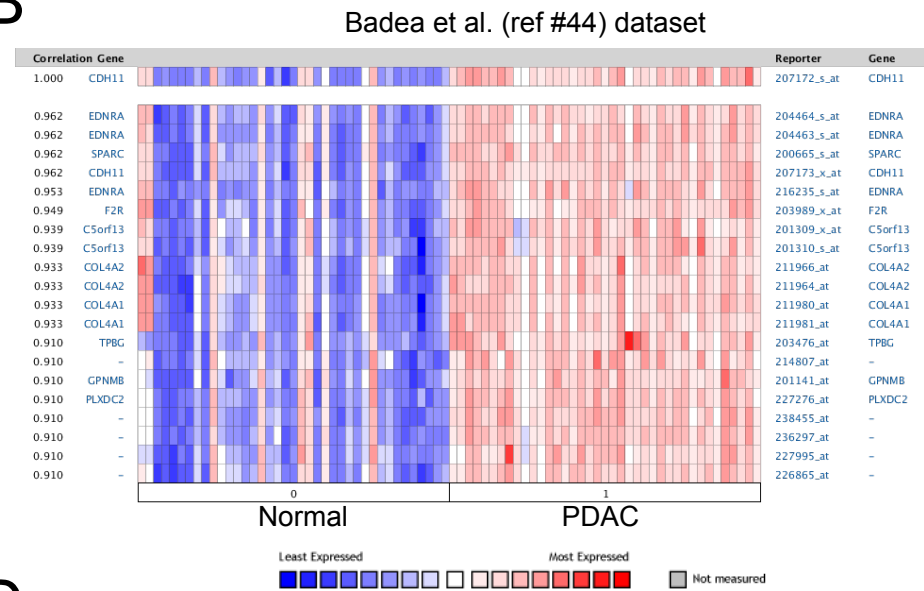

C

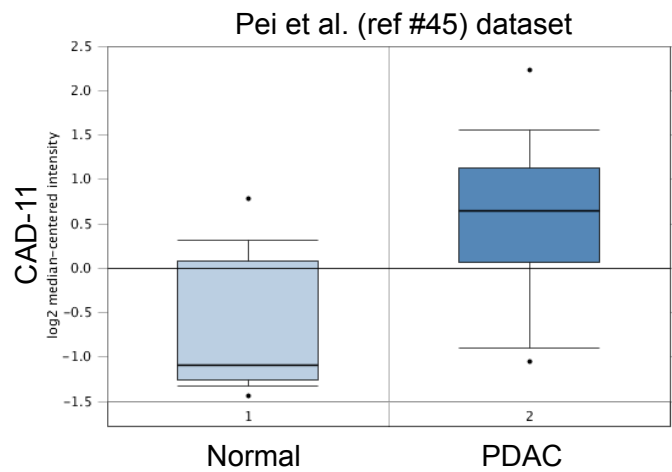

D

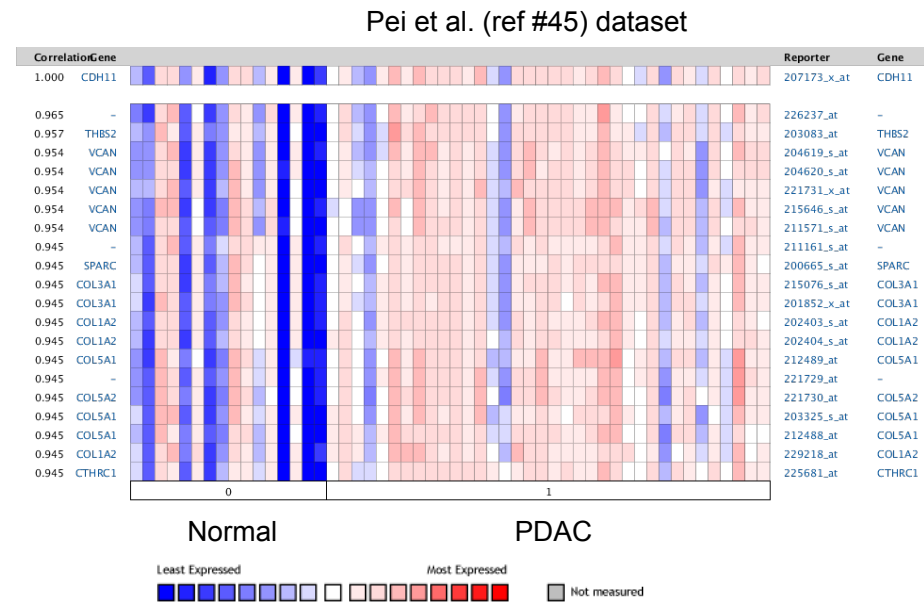

Supplement: mmc2.pdf [file mmc2.pdf]

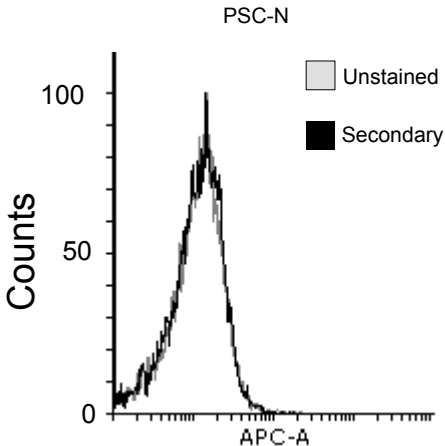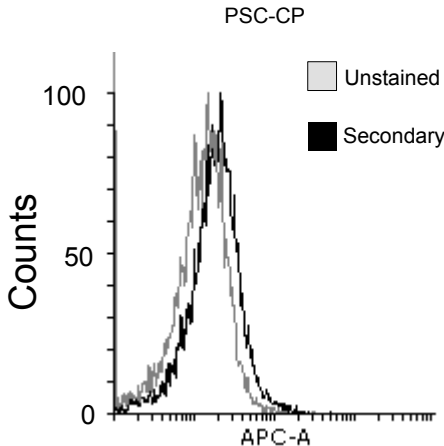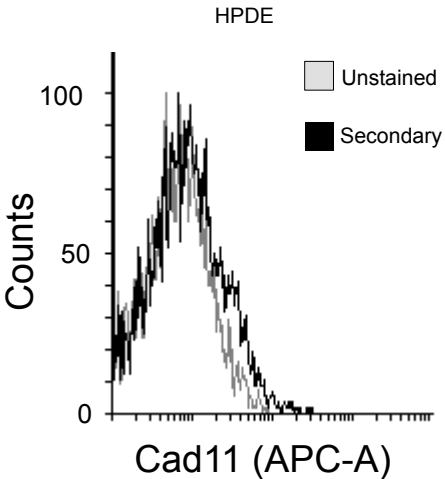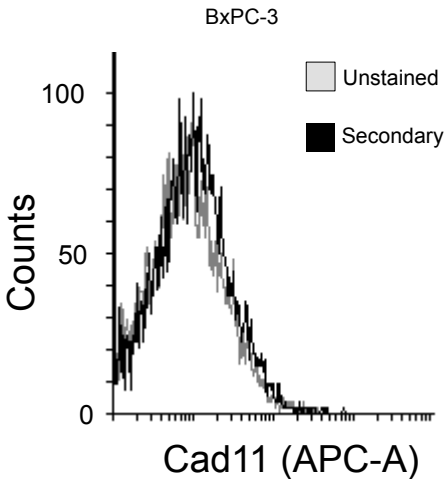

Supplement: mmc3.pdf [file mmc3.pdf]

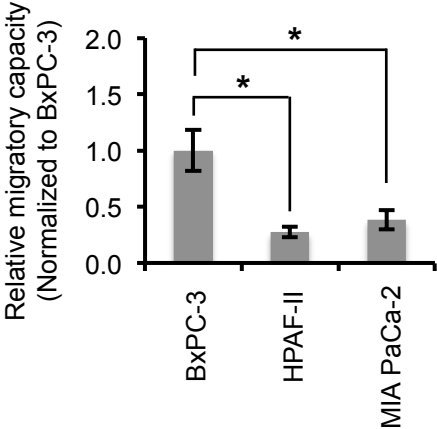

Supplement: mmc4.pdf [file mmc4.pdf]
